# Supplementary material for: Medical Assistance in Dying in Canada: A Multidisciplinary Pan-Canadian Delphi Study to Inform Clinical Practice Documents and Plan a Research Agendas
Source: Research Square preprint supplement (doi:10.21203/rs.3.rs-8206322/v1), 2026-01-06
Supplement: Supplementary file 1 [file 5ebadc508c91bc6dd42a83de.docx]

**Supplemental Appendices**

**Suppl. Material 1. Figure 1.**

**
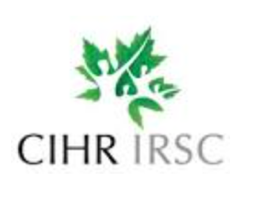
**

**Medical Assistance in Dying (MAiD) in Canada:**

**A Multidisciplinary Pan-Canadian**

**Knowledge Translation Initiative to Improve Practice Documents**

**and Plan A Research Agenda on Suffering in the Context of a MAiD Request**

**July 14-15, 2022**

**Chair: Dr. Melissa Henry**

**Day 1 – July 14**

| ***9:55 Participants arrive*** |
| --- |

10:00 – 10:30 Opening statement and roundtable

10:30 – 10:50 **Session 1**

Annual Report on MAiD in Canada, evolving legislation, MAiD statistics, changes to data collection and monitoring, work with the provinces and territories, Parliamentary review

Panel: Health Canada – Jacquie Lemaire (20 min)

10:50 – 11:10 **Session 2**

Data currently collected as it relates to MAiD, end of life care, and health care inequities

Panel: Canadian Institute for Health Information – Tracey Johnson (20 min)

11:10 – 11:35 **Session 3**

Discussion on Sessions 1 and 2 (25 min)

Topic:

- What research questions can be studied with the existing data on MAiD in Canada?
- What are current and potential efforts to integrate patient-reported outcomes within MAiD data?
- What data could be optimally collected as it relates to suffering and options other than MAiD presented to relieve suffering?

11:35 – 12:10 **Session 4**

Patient, caregiver, and healthcare provider testimonies on the complexities of a MAiD request and its underlying suffering

Panel: Ghislaine Rouly (20 min) and Melissa Henry (10 min)

Question period (5 min)

| ***12:10 – 12:25 Morning Break*** |
| --- |

12:25-12:45 **Session 5**

MAiD in Canada: Results of a scoping review on how suffering is defined, assessed, and addressed in clinical practice documents

Panel: Melissa Henry, Ali Alias, Vanessa Bisson-Gervais, Jun Liu (20 min)

12:45 – 13:05 **Session 6**

Premises and evidence in the rhetoric of Medical Assistance in Dying and euthanasia – underlying values to how suffering is assessed and addressed in Canada and in other countries (20 min)

Panel: Brian Mishara

13:05-13:45 **Session 7**

Irremediable psychiatric suffering in the context of medical assistance in dying in Belgium and The Netherlands

Panel : Luc Deliens (20 min) and Natalie Evans (20 min)

13:45 – 14:10 **Session 8**

Discussion on sessions 5, 6, and 7 (25 min)

Topic:

- Debate on further refining current practice documents to address suffering within the context of a MAiD request considering the MAiD legislation and its underlying values: What are the Pros and Cons of refining practice documents

| ***14:10 – 14:40 Lunch*** |
| --- |

14:40 – 15:20 **Session 9**

The role of palliative care in patients requesting or considering MAID

Panel: James Downar and Justin Sanders (40 min)

15:20 – 15:50 **Session 10**

Access to palliative care in Canada: what we know in 2022

Panel: Romayne Gallagher (30 min)

15:50 – 16:15 **Session 11**

Discussion on Sessions 9 and 10 (25 min)

Topics:

- What are the central points to include in MAiD clinical practice documents as they relate to evaluating and managing suffering from physical symptoms?
- What issues of access and sociodeterminants of health should be covered in MAiD clinical practice documents as they pertain to suffering from physical symptoms?
- What are main issues to study relative to a MAiD request as they relate to suffering from physical symptoms, access to palliative care, and sociodeterminants of health?

***16:15 – 16:30 Afternoon Break***

16:30 – 17:00 **Session 12**

Review of main issues, evidence-based assessment and interventions to relieve existential/spiritual suffering

Panel: Harvey Chochinov (30 min)

17:00 – 17:20 **Session 13**

Review of main issues, evidence-based assessment and interventions to relieve psychological suffering and comorbid psychiatric conditions in the medically ill

Panel: Jacynthe Rivest (20 min)

17:20 – 17:40 **Session 14**

Suicide prevention: Distinction between suicidal ideation and MAiD

Panel: Brian Mishara (20 min)

17:40 – 17:50 **Session 15**

MAiD and mental illness – Patient experience and discussion

Panel: Georgia Vrakas (10 min)

17:50 – 18:15 **Session 16**

Discussion on Sessions 12-15 (25 min)

Topics:

- What are the central points to include in MAiD clinical practice documents as they relate to evaluating and managing psychological and existential/spiritual suffering?
- What are main issues to study as they relate to psychological and existential/spiritual suffering in the context of MAiD?

| ***18:15 Closing Day 1*** |
| --- |

**Day 2 – July 15**

| ***9:55 Participants arrive*** |
| --- |

10:00 – 10:20 **Session 17**

Review of main issues, evidence-based assessment and interventions to relieve social/interpersonal suffering

Panel: Melissa Henry (20 min)

10:20 – 10:45 **Session 18**

Discussion on Session 17 (25 min)

Topic:

- What are the central points to include in MAiD clinical practice documents as they relate to managing social/interpersonal suffering in the context of MAiD?
- What are main issues to study as they relate to social/interpersonal suffering in the context of MAiD?

| ***10:45 – 11:00 Morning Break*** |
| --- |

11:00 – 11:30 **Session 19**

Education on MAiD in Canada and needs of health care professionals

Panel: Stefanie Green and Madeline Li (30 min)

11:30 – 11:55 **Session 20**

Discussion on Session 19

Topic: What are the central points to include in MAiD clinical practice about education on MAiD (25 min)

11:55-13:10 **Research and clinical practice document priorities and Delphi study planning**

Present a list of changes to clinical practice documents discussed so far and guidance for discussion in breakout rooms (Melissa Henry) (5 min)

Small group discussions in breakout rooms: clinical practice change priorities in assessment/tools and presentation of alternatives (40 min)

Presentation and discussion among larger group (4 min each group; 25 min total + 5 min for additional comments)

| ***13:10 – 13:40 Lunch*** |
| --- |

13:40-14:55 **Research and clinical practice guideline priorities and Delphi study planning**

Present a list of research priorities discussed so far and guidance for discussion in breakout rooms (Melissa Henry) (5 min)

Small group discussions in breakout rooms: research priorities (40 min)

Presentation and discussion among larger group (4 min each group; 25 min total + 5 min for additional comments)

| ***14:55 – 15:10 Afternoon Break*** |
| --- |

15:10-16:25 **Next Steps**

Special issue planning: Entire research team

Delphi study planning: Entire research team to identify participants

Discuss 3 top research priorities and plan research groups around them / plan for preliminary data to include in a grant application

Upcoming funding competitions planning: Entire research team

| ***16:25 – 16:40 Closing and departure*** |
| --- |

Suppl. Material Table 1. Overall themes that did not reach consensus.

| **Theme** | **Round 1**  **Mean (Median)**  **%**  **n=46** | **Round 2**  **Mean (Median)**  **%**  **n=53** | **Round 3**  **Mean (Median)**  **%**  **n=54** |
| --- | --- | --- | --- |
| There are evidence-based palliative and supportive care guidelines for management of symptoms and distress, and these could be integrated into the MAiD process of assessment. Screening for distress as the 6th vital sign could be more comprehensively covered with inclusion of clinical pathways. | 3.81(4.00)  62% | 3.64 (4.00)  60% | 3.72 (4.00)  62% |
| Integration of suicide prevention in the MAiD evaluation. | 3.71 (4.00)  58% | 3.82 (4.00)  62% | 3.76 (4.00)  61% |
| Integrate trauma-informed and recovery-oriented models of care. | 3.81(4.00)  59% | 3.69 (4.00)  62% | 3.71(4.00)  59% |

Suppl. Material Table 2. Clinical practice document changes that did not reach consensus.

| **Theme** | **Round 1**  **Mean (Median)**  **%**  **n=46** | **Round 2**  **Mean (Median)**  **%**  **n=53** | **Round 3**  **Mean (Median)**  **%**  **n=54** |
| --- | --- | --- | --- |
| Address stigma towards palliative care. | 3.87 (4.00)  63% | 3.90 (4.00)  67% | 3.92 (4.00)  68% |
| Integrate assessments of suicidality into MAiD assessments to identify requesters who are suicidal. | 3.73 (4.00)  54% | 3.87 (4.00)  64% | 3.81 (4.00)  61% |
| Offer dignity therapy and other therapies that may benefit existential distress. | 3.76 (4.00)  58% | 3.74 (4.00)  59% | 3.78 (4.00)  61% |
| Provide spiritual or pastoral professionals when the evaluation reveals that social determinants of health are a significant component of suffering. | 3.35 (3.00)  54% | 3.23 (3.00)  59% | 3.20 (3.00)  61% |
| Integrate best practices related to the development or improvement of resilience and coping strategies when facing mental health comorbidities. | 3.74 (4.00)  61% | 3.74 (4.00)  67% | 3.65 (4.00)  59% |
| Mention that the evaluation of suffering is complex and has a therapeutic component, which requires specific training and skills. | 3.66 (4.00)  58% | 3.62 (4.00)  54% | 3.69 (4.00)  58% |
| Consider the central role of a nurse navigator in the creation of interdisciplinary teams. | 3.68 (3.00)  53% | 3.36 (3.00)  62% | 3.52 (3.00)  58% |
| Integrate recovery-oriented models in palliative care and MAiD practice. | 3.24 (3.00)  57% | 3.18 (3.00)  64% | 3.31 (3.00)  57% |
| Address stigma towards opioids. | 3.55 (4.00)  58% | 3.62 (4.00)  59% | 3.55 (4.00)  56% |
| Integrate trauma-informed care in palliative care and MAiD practice. | 3.63 (4.00)  55% | 3.64 (4.00)  59% | 3.60 (4.00)  55% |
| Include screening for distress as the 6th vital sign with inclusion of clinical pathways. | 3.54 (4.00)  51% | 3.46 (3.00)  51% | 3.54 (4.00)  52% |

Suppl. Material Table 3. Research priorities that did not reach consensus.

| **Theme** | **Round 1**  **Mean**  **(Median)**  **%**  **n=46** | **Round 2**  **Mean**  **(Median)**  **%**  **n=53** | **Round 3**  **Mean**  **(Median)**  **%**  **n=54** |
| --- | --- | --- | --- |
| Identify brief, validated, and relevant psychometric measures of suffering that can be integrated into MAiD clinical assessments. | 3.56 (4.00)  61% | 3.62 (4.00)  69% | 3.67 (4.00)  69% |
| Develop standards and quality indicators for palliative care in Canada to be integrated into the MAiD monitoring system through Health Canada and the Canadian Institute of Health Information. | 3.97 (4.00)  64% | 4.08 (4.00)  67% | 4.07 (4.00)  68% |
| Evaluate whether the inclusion of a social worker and other psychosocial professional consultations as part of MAiD assessment changes the desire for MAiD in patients suffering from non-life-threatening conditions. | 3.79 (4.00)  63% | 3.85 (4.00)  67% | 3.91 (4.00)  68% |
| Develop a public health strategy on palliative care, with media campaigns designed to educate the public on palliative care in a way that associates it with life and promotes hopefulness. | 3.84 (4.00)  61% | 3.79 (4.00)  64% | 3.83 (4.00)  66% |
| Understand the contribution of health literacy in patients refusing palliative and psychosocial interventions. | 3.57 (4.00)  59% | 3.72 (4.00)  64% | 3.68 (4.00)  64% |
| Identify a validated core set of measures to optimally assess suffering in MAiD requests and orient evidence-based interventions to address this suffering. | 3.73 (4.00)  59% | 3.72 (4.00)  62% | 3.75 (4.00)  63% |
| Understand the contribution of stigma in patients refusing palliative and psychosocial interventions. | 3.53 (4.00)  58% | 4.00 (4.00)  62% | 3.66 (4.00)  63% |
| Identify how family and friends can be best supported through the process of MAiD evaluation, MAiD provision, and post-MAiD. | 3.79 (4.00)  58% | 3.72 (4.00)  56% | 3.83 (4.00)  62% |
| Explore the ethical dilemma of offering MAiD for patients during a mental illness episode and the role of suicide prevention in these cases. | 3.73 (4.00)  58% | 3.69 (4.00)  59% | 3.79 (4.00)  62% |
| Better understand public knowledge and attitudes regarding palliative care. | 3.71 (4.00)  61% | 3.74 (4.00)  62% | 3.71 (4.00)  61% |
| Identify how stigmata affect the provision of optimal care in the context of MAiD. | 3.66 (4.00)  58% | 3.74 (4.00)  64% | 3.68 (4.00)  61% |
| Understand how the experience of MAiD providers changes over the years. | 3.82 (4.00)  55% | 3.69 (4.00)  54% | 3.80 (4.00)  60% |
| Describe the psychological and practical/social factors involved in desire for hastened death in patients according to their disease trajectory (e.g., cancer, cardiovascular, neurodegenerative disease). | 3.61 (4.00)  55% | 3.69 (4.00)  56% | 3.74 (4.00)  60% |
| Identify how stigmata around opioid use affect the provision of optimal care in the context of MAiD. | 3.16 (3.00)  46% | 3.15 (3.00)  61% | 3.15 (3.00)  59% |
| Identify differences and similarities between people requesting MAiD and those who are suicidal. | 3.58 (4.00)  55% | 3.72 (4.00)  59% | 3.65 (4.00)  57% |
| Determine the impact of previous suicide attempts on current suffering, and perceived eligibility for MAID. | 3.55 (4.00)  52% | 3.59 (4.00)  59% | 3.59 (4.00)  57% |
| Better understand resilience and coping within the context of MAiD requests. | 3.42 (3.50)  50% | 3.41 (3.00)  56% | 3.42 (3.00)  56% |
| Better understand how the experience of MAiD providers changes according to certain contextual factors such as work setting, disease trajectory, and organizational culture. | 3.68 (4.00)  53% | 3.67 (3.00)  51% | 3.74 (4.00)  54% |
| Identify how stigma around palliative care affect the provision of optimal care in the context of MAiD. | 3.45 (4.00)  53% | 3.44 (4.00)  54% | 3.46 (4.00)  54% |
| Compare provider and patient/family caregiver perspectives on suffering in MAiD requests. | 3.55 (4.00)  55% | 3.49 (3.00)  49% | 3.50 (4.00)  53% |
| Understand how the awareness and availability of palliative sedation affects the decision to pursue MAiD. | 3.61 (4.00)  55% | 3.44 (4.00)  54% | 3.50 (4.00)  52% |
| Better understand what the public believes is an appropriate response to suffering and whether MAiD is a solution to this suffering. | 3.27 (4.00)  54% | 3.33 (3.00)  51% | 3.24 (3.00)  52% |
| Evaluate whether the inclusion of a social work consultation as part of a MAID assessment may affect the suffering reported by people who request MAID under track 2 (i.e., non-forseable death). | 3.58 (4.00)  55% | 3.46 (3.00)  51% | 3.56 (4.00)  51% |
| Determine whether a trauma-informed approach to MAiD assessments may affect the suffering reported by those requesting MAiD. | 3.39 (3.00)  53% | 3.46 (4.00)  51% | 3.44 (3.00)  51% |
| Better understand best practices in approaching MAiD assessments from a trauma-informed perspective. | 3.30 (3.00)  53% | 3.46 (4.00)  56% | 3.36 (3.00)  51% |
| Better understand the contribution of childhood and recent trauma to a patient’s request for MAiD. | 3.13 (3.00)  61% | 3.31 (3.00)  59% | 3.15 (3.00)  64% |

| **Suppl. Material Table 4 – Differences in ratings of items between clinicians, researchers and policymakers** | | | | | | | |
| --- | --- | --- | --- | --- | --- | --- | --- |
| T6CP1:Address issues of cultural competency and sensitivity to diversity in addressing how patients, caregivers, and healthcare practitioners envision life, death, suffering, and the role of medicine. | | | | | | | |
| Clinician (N= 17) | Researcher (N= 14) | | Policy-Maker (N=7) | | | Chi-Squared | |
| Consensus reached (score of 4&5) | 4&5 | | 4&5 | | | χ² (2, N = 38) = 7.32, p = 0.03* | |
| 9 (53%) | 12 (86%) | | 7 (100%) | | |
| T6RP1: Understand the influence of cultural factors on MAiD requests, use of palliative care services, and the assessment of suffering. | | | | | | | |
| Clinician (N = 17) | Researcher (N= 14) | | Policy-Maker (N=7) | | | Chi-Squared | |
| 4&5 | 4&5 | | 4&5 | | | χ² (2, N =38) =6.05, p = 0.05 | |
| 11 (65%) | 14 (100%) | | 5 (71%) | | |
| T6RP2: Understand the impact of social and cultural factors on the interpretation of suffering from the perspective of patients, families, and healthcare practitioners. | | | | | | | |
| Clinician (N = 17) | Researcher (N= 14) | | Policy-Maker (N=7) | | Chi-Squared | | |
| 4&5 | 4&5 | | 4&5 | | χ² (2, N =38) =5.34, p = 0.07 | | |
| 10 (59%) | 13 (93%) | | 6 (86%) | |
| T7CP5: Address stigma towards mental health. | | | | | | | |
| Clinician (N = 17) | Researcher (N= 14) | | Policy-Maker (N=7) | | | Chi-Squared | |
| 4&5 | 4&5 | | 4&5 | | | χ² (2, N =38) = 4.47, p = 0.11 | |
| 12 (71%) | 13 (93%) | | 7 (100%) | | |
| T7RP2: Determine the impact of early and timely psychosocial care on requests for MAiD. | | | | | | | |
| Clinician (N = 17) | | Researcher (N= 14) | | Policy-Maker (N=7) | | | Chi-Squared |
| 4&5 | | 4&5 | | 4&5 | | | χ² (2, N =38) = 23.95, p = 0.001*** |
| 10 (59%) | | 13 (93%) | | 4 (57%) | | |
| T7RP3: Identify how stigmata affect the provision of optimal care in the context of MAiD. | | | | | | | |
| Clinician (n = 21) | | Researcher (n=20) | | Policy-Maker (n=8) | | | Chi-Squared |
| 4&5 | | 4&5 | | 4&5 | | | χ² (2, N = 49) = 2.93, p = 0.23 |
| 10 (48%) | | 14 (70%) | | 6 (75%) | | |
| T7RP6: Identify how mental health stigma affect the provision of optimal care in the context of MAiD. | | | | | | | |
| Clinician (n = 21) | | Researcher (n=18) | | Policy-Maker (n=8) | | | Chi-Squared |
| 4&5 | | 4&5 | | 4&5 | | | χ² (2, N = 47) = 11.94, p = 0.00*** |
| 13 (62%) | | 18 (100%) | | 8 (100%) | | |
| T8RP6: Describe the psychological and practical/social factors involved in desire for hastened death in patients according to their disease trajectory (e.g., cancer, cardiovascular, neurodegenerative disease). | | | | | | | |
| Clinician (n = 21) | | Researcher (n=20) | | Policy-Maker (n=8) | | | Chi-Squared |
| 4&5 | | 4&5 | | 4&5 | | | χ² (2, N = 49) = 8.90, p = 0.01** |
| 12 (57%) | | 18 (90%) | | 3 (38%) | | |
| T10CP1: Integrate diagnostic tools to evaluate mental health comorbidities in patients requesting MAiD. | | | | | | | |
| Clinician (n = 17) | | Researcher (n=14) | | Policy-Maker (n=7) | | | Chi-Squared |
| 4&5 | | 4&5 | | 4&5 | | | χ² (2, N =38) = 6.95, p = 0.03* |
| 9 (53%) | | 13 (93%) | | 6 (86%) | | |
| T10CP2: Outline the various treatment options (pharmacologic, psychotherapy) available for psychiatric illness and psychological distress. | | | | | | | |
| Clinician (n = 17) | | Researcher (n=14) | | Policy-Maker (n=7) | | | Chi-Squared |
| 4&5 | | 4&5 | | 4&5 | | | χ² (2, N =38) = 14.57, p = 0.00*** |
| 8 (47%) | | 14 (100%) | | 7 (100%) | | |
| T11RP2: Engage national leaders and stakeholders to develop and enact a public health strategy on palliative care. | | | | | | | |
| Clinician (n = 21) | | Researcher (n=18) | | Policy-Maker (n=8) | | | Chi-Squared |
| 4&5 | | 4&5 | | 4&5 | | | χ² (2, N = 47) = 5.59, p = 0.06 |
| 15 (71%) | | 15 (83%) | | 3 (38%) | | |
| Theme 1 overall: Create a core set of standards and ensuing quality indicators for palliative care specifically in Canada to be integrated into the general monitoring system for end-of-life care. | | | | | | | |
| Clinician (n = 17) | | Researcher (n=14) | | Policy-Maker (n=7) | | | Chi-Squared |
| 4&5 | | 4&5 | | 4&5 | | | χ² (2, N =38) = 3.90, p = 0.14 |
| 11 (65%) | | 13 (93%) | | 6 (86%) | | |
| Theme 5: Social determinants of health need to be integrated into the evaluation of MAiD requests. | | | | | | | |
| Clinician (n = 17) | | Researcher (n=14) | | Policy-Maker (n=7) | | | Chi-Squared |
| 4&5 | | 4&5 | | 4&5 | | | χ² (2, N =38) = 3.90, p = 0.14 |
| 11 (65%) | | 13 (93%) | | 6 (86%) | | |
| Theme 6: Develop a model for MAiD that is culturally competent. | | | | | | | |
| Clinician (n = 17) | | Researcher (n=14) | | Policy-Maker (n=7) | | | Chi-Squared |
| 4&5 | | 4&5 | | 4&5 | | | χ² (2, N =38) = 12.52, p = 0.00*** |
| 9 (53%) | | 14 (100%) | | 7 (100%) | | |
| Theme 7: Introducing palliative and psychosocial care services early in the disease trajectory. | | | | | | | |
| Clinician (n = 17) | | Researcher (n=14) | | Policy-Maker (n=7) | | | Chi-Squared |
| 4&5 | | 4&5 | | 4&5 | | | χ² (2, N =38) = 7.11, p = 0.03* |
| 12 (71%) | | 14 (100%) | | 7 (100%) | | |
| Theme 8: Offer supportive care for people suffering from non- life-threatening conditions. | | | | | | | |
| Clinician (n = 17) | | Researcher (n=14) | | Policy-Maker (n=7) | | | Chi-Squared |
| 4&5 | | 4&5 | | 4&5 | | | χ² (2, N =38) = 8.07, p = 0.02* |
| 10 (59%) | | 14 (100%) | | 6 (86%) | | |
| Theme 9: Maintaining supportive care during the 90-day wait period until MAiD is performed. | | | | | | | |
| Clinician (n = 17) | | Researcher (n=14) | | Policy-Maker (n=7) | | | Chi-Squared |
| 4&5 | | 4&5 | | 4&5 | | | χ² (2, N =38) = 6.06, p = 0.05 |
| 12 (71%) | | 14 (100%) | | 6 (86%) | | |

* p<0.05; ** p<0.01; *** p<0.001

| **Suppl. Material Table 5 – Key Improvements to Integrate in MAiD Clinical Practice Documents** |
| --- |
| Based on our meetings and Delphi study, the following are key improvements that could be considered for integration in clinical practice documents with the goal of improving assessing and addressing suffering in the context of a MAiD request. The clinical guidelines referenced mainly relate to oncology, as cancer is the main disease in people requesting MAiD in Canada. These guidelines could generically be considered appropriate for other disease sites. However, other guidelines may exist for other diseases involved in MAiD such as cardiovascular, respiratory, neurological, and organ failure. The items having reached consensus for each of the key improvements described are found at the end of this section.  **1) Screening for distress, basic psychosocial needs assessment, and referral pathways.**  Note: While screening for distress itself did not reach consensus in our Delphi study, we are mentioning it here as a tool to address certain items that reached consensus, such as those referring to the importance of identifying sources of distress, conducting a basic psychosocial needs assessment, and integrating the evaluation of social determinants of health. Screening for distress could be used as an entry point and complementary to the MAiD assessments being done. They could also be carried out systematically by the treating team when a patient is requesting MAiD, to ensure that needs are identified and resources properly presented. The Canadian Problem Checklist includes the items typically covered in social determinants of health screening. More specifically, the items that reached consensus and that would support screening for distress are “Offer psychosocial care for identified distress as early as the onset of diagnosis and at crucial times during the disease trajectory”, “Include a basic psychosocial needs assessment within the context of a MAiD request”, and “Integrate the evaluation of social determinants of health as part of a MAiD assessment.  Evaluating the attribution of the suffering is an important practice standard. It is important to ensure the suffering is due to the medical condition or state of decline and not primarily or solely due to an unmet psychosocial need. A global evaluation of suffering is key in the context of the known multidimensional nature of suffering. It is considered important to offer psychosocial care for identified distress as early as the onset of diagnosis and at crucial times during the disease trajectory. It is estimated that 30-40% of patients will require specialized professional intervention for symptom management and/or distress during their illness, considered essential to improve outcomes.  Screening for distress has been recommended in medical illness for all patients as early as the onset of diagnosis and at crucial timepoints in the illness trajectory, for example using the Minimum Data Set, including the Edmonton Symptom Assessment System (ESAS-r) and the Canadian Problem Checklist (CPC). Screening for distress could be used within the context of a MAiD request to orient care in a way as to address patient suffering. Screening for distress is typically used to identify psychosocial, practical, and physical concerns. It is followed by a basic biopsychosocial needs assessment and proper referrals to address these concerns, factoring both patient and family needs. It is considered essential to clarify bio-psycho-social-existential issues associated with suffering (including unmet needs related to social determinants of health) in patients requesting MAiD in the context of life-threatening and non-life-threatening conditions. Depression and suicidal ideation would be systematically assessed. It is important to mention that different professionals have different areas of expertise in assessing psychosocial, practical, and physical concerns. This is why working in an integrated multidisciplinary team and using a collaborative care approach can be important in addressing the suffering related to MAiD requests.  In addition to screening for distress, a core set of brief validated measures for psychological, practical/social, and existential distress can be used to complement the evaluation of patients’ suffering (for example, the PHQ-9 for depression, the GAD-7 for anxiety, the Brief Pain Inventory for pain, the Patient Dignity Inventory to measure dignity-related distress, items of the PRAPARE screening tool for social determinants of health, a single-item or short-form measure of demoralization, hopelessness, loneliness, and/or burdensomeness). There also exists a measure of unbearability of suffering at the end of life, the State Of Suffering-Five (SOSV) scale, which comprises 69 aspects of suffering in five domains: Medical signs and symptoms; loss of function; personal aspects; aspects of the social environment; and nature and prognosis of disease. Without being diagnostic, these tools alongside a clinical assessment can identify emotional distress and social comorbidities in patients requesting MAiD to ensure proper allocation of resources to support them in the process. One would suggest the integration of diagnostic tools to evaluate mental health comorbidities in patients requesting MAiD. This would include tools to systematically evaluate depression and suicidal ideation, and whether they may be affecting a wish to hasten death.  Patients that are ineligible for MAiD at the time of the assessment can be referred to members of the interdisciplinary team, to address their psychosocial, practical and physical concerns. One ought to assess suicide risk in these situations, through initial screening followed by a more complete evaluation and rapid referral process. Continued support via community resources and psychological assistance could be provided to patients and caregivers during the 90-day wait period for patients requesting MAiD in the context of a non-life-threatening condition.  The tools mentioned above could be integrated within the context of a MAiD assessment. A standard form could be developed with topics to cover during the MAiD assessment to ensure that all domains related to patients’ suffering are covered in the assessment. CAMAP is developing educational tools on a comprehensive assessment of suffering in MAiD.  *To assist in evaluating suicidality, please see:*  Mental Health Commission of Canada (2023). *Suicide Risk Assessment Toolkit: A resource for healthcare workers and organizations*. Retrieved October 10, 2023 from <https://www.mentalhealthcommission.ca/wp-content/uploads/drupal/2021-01/mhcc_cpsi_suicide_risk_assessment_toolkit_eng.pdf>).  American Psychiatric Association (2023). *Assessing and treating suicidal behaviors (A quick reference guide)*. Retrieved October 12, 2023 from <https://psychiatryonline.org/pb/assets/raw/sitewide/practice_guidelines/guidelines/suicide-guide.pdf/>  *For screening for distress practice guidelines, please see:*  Canadian Partnership Against Cancer (2012). *Screening for distress, the 6th vital sign: A guide to implementing best practices in person-centred care*. Retrieved October 10th, 2023 from <https://s22457.pcdn.co/wp-content/uploads/2018/12/Screening-Distress-6th-Vital-Sign-EN.pdf>.  For the ESAS, see: go to www.palliative.org and choose "Assessment Tools" under "Health Professionals." The ESAS is available in different languages: https://www.cancercare.on.ca/cms/one.aspx?objectId=58189&contextId=1377  *For the assessment of psychosocial health care needs, please see:*  Canadian Partnership Against Cancer / Canadian Association of Psychosocial Oncology (2009). *A Pan-Canadian Clinical Practice Guideline: Assessment of Psychosocial Health Care Needs of the Adult Cancer Patient*. Retrieved October 10, 2023 from <https://www.capo.ca/resources/Documents/Guidelines/1.%20Pan%20Canadian%20Guideline-%20Assessment%20of%20Psychosocial%20Health%20Needs%20of%20the%20Adult%20Cancer%20Patient.pdf>.  Groupe de recherche sur la souffrance psychique et l’AMM Département de psychiatrie, CHUM et CRCHUM (2017). Retrieved December 27, 2023 from <https://cms.cmq.org/files/documents/Pratiquer-medecine/fin-de-vie/exploration-souffrance-psychique.pdf>.  **2) Outlining treatment options for suffering as part of consent.** As part of the process of MAiD assessment and provision, as required by law one would outline the various evidence-based treatment options (pharmacologic, psychotherapy, other) available to address unbearable suffering, integrating current palliative and supportive care guidelines for management of symptoms, distress, mental health conditions, and underlying social determinants of health. One could consider and discuss a palliative approach as early as the onset of diagnosis as well as involving a social worker and other psychosocial professionals when the evaluation reveals that social determinants of health are a significant component of suffering. There are several clinical practice guidelines that can aid in addressing suffering and would need to be presented to patients as part of consent for MAiD. As part of consent, one would address stigma towards seeking help for suffering, by providing information, normalizing, and addressing any misconceptions and beliefs (ex. stigma towards mental health and related to consultation of a psychologist, psychiatrist, or social worker, and/or taking anti-depressant medication). While proper staffing is considered key to provide psychosocial care and evidence-based interventions for unbearable suffering, one would suggest mapping out resources in the healthcare network to be able to develop pathways and appropriately refer within the system’s access constraints, including at the hospital and community levels. Health care models including stepped-care approaches and task shifting could be recommended in situations when resources are lacking to address unbearable suffering. Clear roles, responsibilities, and clinical pathways are key for each member of the interdisciplinary care team to assess and address suffering in MAiD requests. The interdisciplinary team goes beyond physicians and nurses when suffering is at play, the latter context typically requiring collaborative care approaches.  *For palliative care guidelines on symptom management, please see:*  National Comprehensive Cancer Network (NCCN) (2023). *NCCN Clinical Practice Guidelines in Oncology (NCCN Guidelines)*. Retrieved October 12, 2023 from <https://www.nccn.org/guidelines/category_3>  *For guidelines on psychosocial distress, please see:*  Canadian Partnership Against Cancer / Canadian Association of Psychosocial Oncology (2015). *Pan-Canadian Practice Guideline: Screening, Assessment and Management of Psychosocial Distress, Depression and Anxiety in Adults with Cancer*. Retrieved October 10, 2023 from <https://www.capo.ca/resources/Documents/Guidelines/3APAN-~1.PDF>.  National Comprehensive Cancer Network. *NCCN Clinical Practice Guidelines in Oncology: Distress Management*. v2.2023. Retrieved October 10, 2023 from <https://www.nccn.org/professionals/physician_gls/pdf/distress.pdf>.  Andersen BL, DeRubeis RJ, Berman BS, et al. (2014). American Society of Clinical Oncology. Screening, assessment, and care of anxiety and depressive symptoms in adults with cancer: an American Society of Clinical Oncology guideline adaptation. *Journal of Clinical Oncology, 32*(15), 1605-1619.  *For algorithms for cancer-related distress, depression, and global anxiety, please see:*  Canadian Association of Psychosocial Oncology (2023). *Algorithms for cancer-related distress, depression and global anxiety*. Retrieved October 10, 2023 from <https://www.capo.ca/resources/Documents/Guidelines/4.%20Algorithms%20for%20Cancer-related%20Distress,%20Depression%20and%20Global%20Anxiety.pdf>.  *For the role of psychosocial oncology in Medical Assistance in Dying, please see:*  Canadian Association of Psychosocial Oncology (2017). *Role of psychosocial oncology in medical assistance in dying*. Retrieved October 10, 2023 from <https://www.capo.ca/resources/Documents/3.3.%20Medical%20Assistance%20in%20Dying.pdf>.  **3) Communication and culture.** Communication comprises core communication skills, discussing an early palliative approach to care, goals of care and prognosis, discussing treatment options and clinical trials, discussing end of life care, using communication to facilitate family involvement in care, communicating effectively when there are barriers to communication, discussing cost of care, meeting the needs of underserved populations, and clinician training in communication skills. An organized communication framework and their accompanying tools can facilitate these discussions. It is suggested to engage in conversations around shared decision-making and advanced directives to foster a sense of control and autonomy and address struggles around uncertainty of prognosis. Advanced care planning materials can be used as an aid. A central documentation system in which these discussions are noted and accessible to all team members can aid coordination and continuity of care as it pertains to addressing suffering. An interdisciplinary model of care with clear communication can aid in providing best of care as it pertains to assessing and addressing unbearable suffering in the context of a MAiD request. Evaluating and intervening in a culturally competent and sensitive way is key, drawing upon cultural resources and/or cultural brokers to facilitate the dialogue, and addressing how patients, caregivers, and healthcare practitioners envision life, death, suffering, and the role of the health care team.  Please see: Advanced Care Planning Canada (2023). Advanced care planning in Canada (It’s about conversations, it’s about wishes). Retrieved December 11, 2023 from <https://www.advancecareplanning.ca>Gilligan T, Coyle N, Frankel RM, Berry DL, Bohlke K et al. Patient-Clinician Communication: American Society of Clinical Oncology Consensus Guideline. *Journal of Clinical Oncology, 35*, 3618-3632. Ariadne Labs (2023). *Serious Illness Conversation Guide*. Retrieved October 12, 2023 from <https://www.ariadnelabs.org/wp-content/uploads/2023/05/Serious-Illness-Conversation-Guide.2023-05-18.pdf>  **4) Standards and quality indicators for palliative care in Canada** can be based on the Framework on Palliative Care in Canada <https://healthstandards.org/leading-practices/introduction-to-leading-practices/> and on the Canadian Partnership Against Cancer Palliative Care Competency Framework. <https://www.partnershipagainstcancer.ca/topics/palliative-care-competency-framework/background/>. Competencies in palliative care include twelve domains of practice: 1) Principles of a palliative approach to care; 2) Cultural safety and humility; 3) Communication; 4) Optimizing comfort and quality of life; 5) Care planning and collaborative practice; 6) Last days and hours; 7) Loss, grief, and bereavement; 8) Self-care; 9) Professional and ethical practice; 10) Education, evaluation, quality improvement, and research; 11) Advocacy; and 12) Virtual care. The indicators in each domains may vary according to the context of care and populations (e.g., pediatrics).  Please see:  *Quality indicators in different population:*  Mizuno A, Miyashita M, Hayashi A, Kawai F, Niwa K, Utsunomiya A, Kohsaka S, Kohno T, Yamamoto T, Takayama M & Anzai T (2017). Potential palliative care quality indicators in heart disease patients: a review of the literature. *Journal of Cardiology, 70*(4), 335–341. <https://doi.org/10.1016/j.jjcc.2017.02.010>  Walling AM, Ahluwalia SC, Wenger NS, Booth M, Roth CP, Lorenz K, Kanwal F, Dy S, Asch SM & Palliative Care Cirrhosis Quality Expert Panel. (2017). Palliative care quality indicators for patients with end-stage liver disease due to cirrhosis. *Digestive Diseases and Sciences, 62*(1), 84–92. <https://doi.org/10.1007/s10620-016-4339-3>  Amador S, Sampson EL, Goodman C & Robinson L (2019). A systematic review and critical appraisal of quality indicators to assess optimal palliative care for older people with dementia. *Palliative Medicine*, *33*(4), 415–429. <https://doi.org/10.1177/0269216319834227>  *Quality indicators in different settings:*  Dupont C, De Schreye R, Cohen J, De Ridder M, Van den Block L, Deliens L & Leemans K (2021). Pilot study to develop and test palliative care quality indicators for nursing homes. *International Journal of Environmental Research and Public Health, 18*(2). <https://doi.org/10.3390/ijerph18020829>  Guthrie DM, Williams N, Beach C, Buzath E, Cohen J, Declercq A, Fisher K, Fries BE, Goodridge D, Hermans K, Hirdes JP, Seow H, Silveira M, Sinnarajah A, Stevens S, Tanuseputro P, Taylor D, Vadeboncoeur C, Martin TLW & Scott J (2022). A multi-stage process to develop quality indicators for community-based palliative care using interrai data. *Plos One, 17*(4). <https://doi.org/10.1371/journal.pone.0266569>  Takaoka Y, Hamatani Y, Shibata T, Oishi S, Utsunomiya A, Kawai F, Komiyama N & Mizuno A (2022). Quality indicators of palliative care for cardiovascular intensive care. *Journal of Intensive Care, 10*(1). <https://doi.org/10.1186/s40560-022-00607-6>  **5) Integrate a core set of existential/spiritual and psychosocial care quality indicators in Canada.** Considering the high prevalence of psychosocial and existential/spiritual components to a patient’s suffering when requesting MAiD, in addition to the palliative care indicators above it is considered essential to integrate a core set of existential/spiritual and psychosocial care quality indicators in Canada. Providing appropriate psychosocial and existential/spiritual services is considered a standard of quality cancer care. Main quality indicators include implementing processes to identify patients’ psychosocial and existential/spiritual needs through screening for distress, a further comprehensive needs assessment interview, and plans that link patients with the services they need.  Please see:  Canadian Partnership Against Cancer / Canadian Association of Psychosocial Oncology (2015). *Pan-Canadian Practice Guideline: Screening, Assessment and Management of Psychosocial Distress, Depression and Anxiety in Adults with Cancer*. Retrieved October 10, 2023 from <https://www.capo.ca/resources/Documents/Guidelines/3APAN-~1.PDF>.  American Society of Clinical Society (2014). *ASCO guidelines – Screening, assessment, and care of anxiety and depressive symptoms in adults with cancer*. Retrieved October 11, 2023 from https://old prod.asco.org/sites/new-www.asco.org/files/content-files/practice-and-guidelines/documents/depression-anxiety-summary-of-recs-table.pdf.  Institute of Medicine (2007). *Cancer Care for the Whole Patient: Meeting Psychosocial Health Needs*. National Academies Press: Washington.  Jacobsen PB, Shibata D, Siegel EM, Lee JH, Fulp WJ et al. (2011). Evaluating the quality of psychosocial care in outpatient medical oncology settings using performance indicators. *Psycho-Oncology, 20*, 1221-1227.  Cadotte T, Ismail Z, Moody L & Rugg M (2016). Psychosocial oncology quality indicators prioritization exercise. *Journal of Clinical Oncology, 34*(7), Suppl 7, 277.  Derendorf L, Stock S, Simic D & Lemmen C (2023). Developing quality indicators for cross-sectoral psycho-oncology in Germany: combining the RAND/UCLA appropriateness method with a Delphi technique. *BMC Health Services Research, 23*, 599.  **6)** MAiD assessors and providers have access to **educational curriculum venues that covers evaluating and addressing suffering**. These include the nationally accredited, comprehensive, bilingual, Canadian MAiD Curriculum, offered by the Canadian Association of MAiD Assessors and Providers and other educational avenues on all aspects of suffering from different organizations including in palliative care and psychosocial oncology. It is important to receive continuing education and potentially supervision on how to assess and address unbearable suffering in the context of a MAiD request. One needs to recognize the value of multidisciplinary care and the varied disciplines that are involved in addressing unbearable suffering. Team work is key, as well as an integrated model of care.  Please see:  Canadian Association of MAiD Assessors and Providers (2023). *Canadian MAiD Curriculum*. Retrieved October 12, 2023 from <https://camapcanada.ca/curriculum/curriculum-overview/>  *Items having reached consensus for each key improvement described above:*  Key improvement 1:  -Offer psychosocial care for identified distress as early as the onset of diagnosis and at crucial times during the disease trajectory.  -Clarify bio-psycho-social-existential issues associated with intolerable suffering (including social determinants of health) in patients requesting MAiD in the context of life-threatening and non-life-threatening conditions.  -Integrate an evaluation of unmet needs related to social determinants of health underlying unbearable suffering and indicate whether treatment and therapies exist and are available to the patient, at the hospital and community levels.  -Include a basic psychosocial needs assessment within the context of a MAiD request, considering both patient and family needs.  -Integrate the systematic evaluation of depression and suicidal ideation in the assessment of MAiD requests.  -Integrate the evaluation of social determinants of health as part of a MAiD assessment.  -Include dignity measures and exploration of patients’ suffering.  -Include a core set of brief validated measures for psychological, practical/social, and existential distress for MAID assessors to use in their evaluation of MAiD requests.  -Integrate diagnostic tools to evaluate mental health comorbidities in patients requesting MAiD.  -Integrate the systematic evaluation of depression and suicidal ideation in the assessment of MAiD requests.  -Evaluate suicidality, and whether suicidality may be affecting a wish to hasten death.  -Reinforce the importance of providing or continuing support for patients and caregivers during the 90-day wait period via community resources and psychological assistance.  -Underscore the importance of identifying those who would be at risk of suicide if deemed ineligible for MAiD.  -Integrate follow-up and support for patients found to be ineligible for MAID at the time of the assessment.  Key improvement 2:  Items having reached consensus:  -Integrate current evidence-based palliative and supportive care guidelines for management of symptoms and distress into the process of MAiD assessment and provision  -Address stigma towards mental health  -Mention interventions that may be effective to address existential and psychosocial distress in a patient requesting MAID.  -Outline the various treatment options (pharmacologic, psychotherapy) available for psychiatric illness and psychological distress.  -Establish care models that could be used when resources are lacking to address unbearable suffering.  -Establish clear roles, responsibilities, and clinical pathways for each member of the interdisciplinary care team to assess and address suffering in MAiD requests.  -Integrate an evaluation of unmet needs related to social determinants of health underlying unbearable suffering and indicate whether treatment and therapies exist and are available to the patient, at the hospital and community levels.  Key improvement 3:  -Implement explanations related to shared decision-making and advanced directives as a means to foster a sense of control and autonomy.  -Address issues of cultural competency and sensitivity to diversity in addressing how patients, caregivers, and healthcare practitioners envision life, death, suffering, and the role of medicine.  - Consider and discuss a palliative approach as early as the onset of diagnosis.  Key improvement 4:  -Integrate standards and quality indicators for palliative care specifically in Canada.  Key improvement 5:  -Integrate a core set of existential / psychosocial care quality indicators in Canada.  Key improvement 6:  - Refer to educational curriculum venues for MAiD assessors and providers that comprehensively covers evaluating and addressing suffering |
